# Supplementary material for: Pre-Vaccination Stress, Post-Vaccination Adverse Reactions, and Attitudes towards Vaccination after Receiving the COVID-19 Vaccine among Health Care Workers
Source: MDPI journal article supplement (doi:10.3390/vaccines10030401), 2022-03-06
Supplement: s1 [file s1]

**Table S1.** The survey questionnaire

| Questions                                                                                                                                     | Answers                                                                                                                                                                                                                                                                                                                                                                                                                                                                            |
|-----------------------------------------------------------------------------------------------------------------------------------------------|------------------------------------------------------------------------------------------------------------------------------------------------------------------------------------------------------------------------------------------------------------------------------------------------------------------------------------------------------------------------------------------------------------------------------------------------------------------------------------|
| Did you take the COVID-19 vaccine?                                                                                                            | <ul style="list-style-type: none"> <li>• Yes</li> <li>• No, but I intend to take it in the near future</li> <li>• No, I don't want to take the COVID-19 vaccine</li> </ul>                                                                                                                                                                                                                                                                                                         |
| Did you feel any fear or had any objections prior to the vaccination?                                                                         | <ul style="list-style-type: none"> <li>• No, not at all</li> <li>• No, but I was a little bit unsure</li> <li>• I was neutral</li> <li>• Yes, I felt a little nervous</li> <li>• Yes, I was very nervous and anxious</li> </ul>                                                                                                                                                                                                                                                    |
| What made you decide to take the COVID-19 vaccine in the end? (you can chose up to 2 answers) (skip this question if you are not vaccinated)  | <ul style="list-style-type: none"> <li>• My own health protection</li> <li>• My family health protection</li> <li>• It's the quickest way to going back to normal activities, i.e. contacting with family and friends</li> <li>• My job and the safety of my patients</li> <li>• Other reason, please give your own answer</li> </ul>                                                                                                                                              |
| What made you decide not to take the COVID-19 vaccine in the end? (you can chose up to 2 answers) (skip this question if you are vaccinated). | <ul style="list-style-type: none"> <li>• I don't believe in COVID-19 and the pandemic</li> <li>• I don't believe the vaccine is effective, it was produced too quickly</li> <li>• I don't have time</li> <li>• I am afraid of the side effects</li> <li>• I don't want to take the vaccine, because I believe the vaccine wasn't tested long enough, there wasn't enough time to check and prove its effectiveness</li> <li>• Other reason, please give your own answer</li> </ul> |
| Which vaccine were you given? (skip this question if you weren't vaccinated)                                                                  | <ul style="list-style-type: none"> <li>• AstraZeneca</li> <li>• BioNTech/Pfizer</li> <li>• Moderna</li> <li>• Johnson &amp; Johnson</li> <li>• Other reason, please give your own answer</li> </ul>                                                                                                                                                                                                                                                                                |
| Had the type of vaccine any influence on your decision to take the vaccination?                                                               | <ul style="list-style-type: none"> <li>• No, it didn't matter to me what kind of vaccine I was going to be given</li> <li>• Yes, I delayed the decision to take the vaccination waiting for the right vaccine</li> <li>• I didn't have any choice and was vaccinated with the vaccine I wouldn't personally choose</li> </ul>                                                                                                                                                      |
| Were there any side effects after the vaccination?                                                                                            | <ul style="list-style-type: none"> <li>• Yes, after the first dose</li> <li>• Yes, after the second dose</li> <li>• Yes, after both doses</li> <li>• No, there were no side effects</li> </ul>                                                                                                                                                                                                                                                                                     |
| What side effects did you have after which ever dose of vaccine? (you can chose more than one answer)                                         | <ul style="list-style-type: none"> <li>• the symptoms were minimal, of no importance</li> <li>• higher temperature/ fever</li> <li>• pain in the muscles, bones, general poor feeling</li> <li>• pain in the place of vaccination</li> <li>• headache</li> <li>• allergy</li> <li>• give your own example</li> </ul>                                                                                                                                                               |
| How serious were the side effects after the vaccination?                                                                                      | <ul style="list-style-type: none"> <li>• They were minimal, of no importance</li> <li>• They were bad enough, so I had to stay at home</li> <li>• They were so bad, that not only I stayed at home but I also had to contact my GP</li> </ul>                                                                                                                                                                                                                                      |

|                                                                                                                                           |                                                                                                                                                                                                                                                                                                                                                                               |
|-------------------------------------------------------------------------------------------------------------------------------------------|-------------------------------------------------------------------------------------------------------------------------------------------------------------------------------------------------------------------------------------------------------------------------------------------------------------------------------------------------------------------------------|
|                                                                                                                                           | <ul style="list-style-type: none"> <li>• The side effects were so serious that I had to be taken to hospital</li> </ul>                                                                                                                                                                                                                                                       |
| How long did you suffer the side effects after the vaccination?                                                                           | <ul style="list-style-type: none"> <li>• 1 day</li> <li>• 2-3 days</li> <li>• 4-7 days</li> <li>• longer than one week</li> </ul>                                                                                                                                                                                                                                             |
| If the COVID-19 vaccination was recommended to be taken every year, should it be obligatory for the health professionals in your opinion? | <ul style="list-style-type: none"> <li>• Yes, it should be obligatory</li> <li>• Yes, it should be obligatory, if it is free of charge</li> <li>• No, it should be voluntary</li> </ul>                                                                                                                                                                                       |
| Sex                                                                                                                                       | <ul style="list-style-type: none"> <li>• Woman</li> <li>• Man</li> </ul>                                                                                                                                                                                                                                                                                                      |
| Age                                                                                                                                       | <ul style="list-style-type: none"> <li>• in years .....</li> </ul>                                                                                                                                                                                                                                                                                                            |
| Do you have any underlying chronic diseases?                                                                                              | <ul style="list-style-type: none"> <li>• Yes</li> <li>• No</li> </ul>                                                                                                                                                                                                                                                                                                         |
| Occupation                                                                                                                                | <ul style="list-style-type: none"> <li>• Nurse/ Midwife</li> <li>• Doctor</li> <li>• Nursing/ Midwifery student</li> <li>• Medicine student</li> </ul>                                                                                                                                                                                                                        |
| Job/ study seniority                                                                                                                      | <ul style="list-style-type: none"> <li>• (in years).....</li> </ul>                                                                                                                                                                                                                                                                                                           |
| Place of work (you can chose several)                                                                                                     | <ul style="list-style-type: none"> <li>• Hospital</li> <li>• Outpatient clinic</li> <li>• Specialist Clinic</li> <li>• Hospital Emergency Ward</li> <li>• Emergency</li> <li>• The work outside the health service</li> <li>• I don't work yet, I am still a student</li> </ul>                                                                                               |
| Did you have daily contact with COVID-19 patients during the pandemic?                                                                    | <ul style="list-style-type: none"> <li>• Yes, I worked in an institution which is or temporarily was turned into a COVID-19 institution</li> <li>• No, but many COVID-19 patients were treated in my place of work</li> <li>• No, but it often turned out later that the patient was infected with COVID-19</li> <li>• No, I had no contact with COVID-19 patients</li> </ul> |

**Table S2. *P*-value for the chi-square test of independence between health care workers groups and the decision to vaccinate**

|                                                           | <b>D vs N</b> | <b>D vs MS.</b> | <b>D vs NS</b> | <b>N vs MS</b> | <b>N vs NS</b> | <b>NS vs MS</b> |
|-----------------------------------------------------------|---------------|-----------------|----------------|----------------|----------------|-----------------|
| Decision to vaccinate                                     | <0.001        | 0.060           | 0.009          | <0.001         | 0.061          | <0.001          |
| Reasons for decision to vaccinate                         | 0.142         | 0.001           | 0.004          | 0.054          | 0.777          | 0.001           |
| Obligatory annual vaccination for professionals           | 0.001         | 0.087           | <0.001         | <0.001         | 0.018          | <0.001          |
| Fear prior to the vaccination                             | <0.001        | <0.001          | <0.001         | <0.001         | 0.513          | <0.001          |
| Type of vaccination                                       | 0.288         | 0.133           | <0.001         | 0.461          | <0.001         | <0.001          |
| Influence of the type of vaccine on vaccination decisions | <0.001        | 0.430           | <0.001         | <0.001         | 0.238          | <0.001          |
| Occurrence of adverse reaction after vaccination          | 0.241         | 0.857           | 0.002          | 0.342          | 0.379          | <0.001          |
| Type of adverse reaction after vaccination                | 0.256         | 0.332           | 0.148          | 0.005          | 0.017          | 0.214           |
| Strength of adverse reaction after vaccination            | 0.631         | 0.78            | 0.073          | 0.182          | 0.024          | 0.002           |
| Duration of adverse reaction after vaccination            | 0.531         | 0.026           | 0.641          | 0.002          | 0.381          | 0.001           |

D- Doctors, N- Nurses and Midwives , MS – Medical Students, NS - Nursing and Midwifery students

**Table S3. Determinants of vaccination against COVID-19 among the vaccinated and not-vaccinated younger and older health care workers.**

|                                                    | D<br>N=135 (12.5%) |                 | p (for Z<br>test) | N<br>N=128 (11.8%) |                 | p (for Z<br>test) | MS<br>N=423 (39.2%) |                 | p (for<br>Z test) | NS<br>N=394 (36.5%) |                 | p (for<br>Z test) | Total<br>N=1080 (100%) |                  | p (for<br>Z test) |
|----------------------------------------------------|--------------------|-----------------|-------------------|--------------------|-----------------|-------------------|---------------------|-----------------|-------------------|---------------------|-----------------|-------------------|------------------------|------------------|-------------------|
|                                                    | Junior (69)        | Senior (66)     |                   | Junior (49)        | Senior (79)     |                   | Junior<br>(66)      | Senior<br>(357) |                   | Junior<br>(207)     | Senior<br>(187) |                   | Junior<br>(391)        | Senior<br>(689)  |                   |
| Vaccinated                                         | 66 (95.7%)         | 62 (93.9%)      | 0.654             | 38 (77.6%)         | 63 (79.7%)      | 0.768             | 63<br>(95.5%)       | 353<br>(98.9%)  | 0.046             | 174<br>(84.1%)      | 166<br>(88.8%)  | 0.175             | 341<br>(87.2%)         | 644<br>(93.5%)   | 0.001             |
| My own protection                                  | 43 (36.4%)         | 51 (41.8%)      | 0.396             | 18 (26.9%)         | 39 (36.4%)      | 0.192             | 32<br>(29.1%)       | 201<br>(30.7%)  | 0.737             | 82 (29.9%)          | 90 (32.4%)      | 0.535             | 175<br>(30.8%)         | 381<br>(32.8%)   | 0.395             |
| My family protection                               | 42 (35.6%)         | 29 (23.8%)      | 0.046             | 20 (29.9%)         | 31 (29.0%)      | 0.902             | 41<br>(37.3%)       | 250<br>(38.2%)  | 0.858             | 77 (28.1%)          | 92 (33.1%)      | 0.204             | 180<br>(31.6%)         | 402<br>(34.6%)   | 0.221             |
| Going back to<br>normality                         | 17 (14.4%)         | 14 (11.5%)      | 0.499             | 18 (26.9%)         | 13 (12.1%)      | 0.015             | 25<br>(22.7%)       | 118<br>(18.0%)  | 0.241             | 63 (23.0%)          | 46 (16.5%)      | 0.058             | 123<br>(21.6%)         | 191<br>(16.4%)   | 0.009             |
| the safety of my<br>patients                       | 16 (13.6%)         | 28 (23.0%)      | 0.061             | 10 (14.9%)         | 22 (20.6%)      | 0.352*            | 11<br>(10.0%)       | 82 (12.5%)      | 0.455*            | 45 (16.4%)          | 41 (14.7%)      | 0.588             | 82 (14.4%)             | 173<br>(14.9%)   | 0.793             |
| Other                                              | 0 (0.0%)           | 0 (0.0%)        | -                 | 1 (1.5%)           | 2 (1.9%)        | -                 | 1 (0.9%)            | 4 (0.6%)        | -                 | 7 (2.6%)            | 9 (3.2%)        | 0.633*            | 9 (1.6%)               | 15 (1.3%)        | 0.627*            |
| Total                                              | 118<br>(100.0%)    | 122<br>(100.0%) | Ref               | 67<br>(100.0%)     | 107<br>(100.0%) | Ref               | 110<br>(100.0%)     | 655<br>(100.0%) |                   | 274<br>(100.0%)     | 278<br>(100.0%) | Ref               | 569<br>(100.0%)        | 1162<br>(100.0%) | Ref               |
| Not yet vaccinated                                 | 2 (2.9%)           | 3 (4.5%)        | 0.613             | 7 (14.3%)          | 5 (6.3%)        | 0.136             | 2 (3.0%)            | 2 (0.6%)        | 0.057             | 12 (5.8%)           | 5 (2.7%)        | 0.128             | 23 (5.9%)              | 15 (2.2%)        | 0.002             |
| I don't believe in<br>COVID-19 and the<br>pandemic | 0 (0.0%)           | 0 (0.0%)        | -                 | 1 (12.5%)          | 0 (0.0%)        | -                 | 0 (0.0%)            | 0 (0.0%)        | -                 | 1 (4.3%)            | 0 (0.0%)        | -                 | 2 (5.7%)               | 0 (0.0%)         | -                 |
| I don't believe the<br>vaccine is effective        | 0 (0.0%)           | 0 (0.0%)        | -                 | 2 (25.0%)          | 0 (0.0%)        | -                 | 0 (0.0%)            | 1 (50.0%)       | -                 | 7 (30.4%)           | 3 (30.0%)       | -                 | 9 (25.7%)              | 4 (18.2%)        | 0.512*            |
| I don't have time                                  | 2 (100.0%)         | 0 (0.0%)        | -                 | 1 (12.5%)          | 0 (0.0%)        | -                 | 0 (0.0%)            | 0 (0.0%)        | -                 | 2 (8.7%)            | 1 (10.0%)       | -                 | 5 (14.3%)              | 1 (4.5%)         | -                 |
| I am afraid of the<br>side effects                 | 0 (0.0%)           | 0 (0.0%)        | -                 | 1 (12.5%)          | 1 (14.3%)       | -                 | 1 (50.0%)           | 1 (50.0%)       | -                 | 7 (30.4%)           | 4 (40.0%)       | -                 | 9 (25.7%)              | 6 (27.3%)        | 0.897*            |
| Vaccine wasn't<br>tested long enough               | 0 (0.0%)           | 0 (0.0%)        | -                 | 3 (37.5%)          | 2 (28.6%)       | -                 | 1 (50.0%)           | 0 (0.0%)        | -                 | 6 (26.1%)           | 2 (20.0%)       | -                 | 10 (28.6%)             | 4 (18.2%)        | -                 |
| Other                                              | 0 (0.0%)           | 3 (100.0%)      | -                 | 0 (0.0%)           | 4 (57.1%)       | -                 | 0 (0.0%)            | 0 (0.0%)        | -                 | 0 (0.0%)            | 0 (0.0%)        | -                 | 0 (0.0%)               | 7 (31.8%)        | -                 |
| Total                                              | 2 (100.0%)         | 3 (100.0%)      | Ref               | 8 (100.0%)         | 7 (100.0%)      | Ref               | 2<br>(100.0%)       | 2 (100.0%)      | Ref               | 23<br>(100.0%)      | 10<br>(100.0%)  | Ref               | 35<br>(100.0%)         | 22<br>(100.0%)   | Ref               |

|                                              |            |            |       |            |             |       |            |            |       |             |             |       |             |             |        |
|----------------------------------------------|------------|------------|-------|------------|-------------|-------|------------|------------|-------|-------------|-------------|-------|-------------|-------------|--------|
| Not want vaccinated                          | 1 (1.4%)   | 1 (1.5%)   | 0.975 | 4 (8.2%)   | 11 (13.9%)  | 0.327 | 1 (1.5%)   | 2 (0.6%)   | 0.396 | 21 (10.1%)  | 16 (8.6%)   | 0.590 | 27 (6.9%)   | 30 (4.4%)   | 0.072  |
| I don't believe in COVID-19 and the pandemic | 0 (0.0%)   | 0 (0.0%)   | -     | 1 (12.5%)  | 3 (18.8%)   | -     | 1 (100.0%) | 0 (0.0%)   | -     | 1 (3.1%)    | 1 (4.2%)    | -     | 3 (7.1%)    | 4 (9.3%)    | 0.718* |
| I don't believe the vaccine is effective     | 0 (0.0%)   | 0 (0.0%)   | -     | 3 (37.5%)  | 3 (18.8%)   | -     | 0 (0.0%)   | 0 (0.0%)   | -     | 7 (21.9%)   | 4 (16.7%)   | -     | 10 (23.8%)  | 7 (16.3%)   | 0.388* |
| I don't have time                            | 0 (0.0%)   | 0 (0.0%)   | -     | 0 (0.0%)   | 0 (0.0%)    | -     | 0 (0.0%)   | 0 (0.0%)   | -     | 3 (9.4%)    | 1 (4.2%)    | -     | 3 (7.1%)    | 1 (2.3%)    | -      |
| I am afraid of the side effects              | 0 (0.0%)   | 0 (0.0%)   | -     | 1 (12.5%)  | 5 (31.3%)   | -     | 0 (0.0%)   | 0 (0.0%)   | -     | 12 (37.5%)  | 7 (29.2%)   | -     | 13 (31.0%)  | 12 (27.9%)  | 0.759* |
| Vaccine wasn't tested long enough            | 1 (100.0%) | 1 (100.0%) | -     | 3 (37.5%)  | 5 (31.3%)   | -     | 0 (0.0%)   | 1 (50.0%)  | -     | 7 (21.9%)   | 9 (37.5%)   | -     | 11 (26.2%)  | 16 (37.2%)  | 0.278* |
| Other                                        | 0 (0.0%)   | 0 (0.0%)   | -     | 0 (0.0%)   | 0 (0.0%)    | -     | 0 (0.0%)   | 1 (50.0%)  | -     | 2 (6.3%)    | 2 (8.3%)    | -     | 2 (4.8%)    | 3 (7.0%)    | -      |
| Total                                        | 1 (100.0%) | 1 (100.0%) | Ref   | 8 (100.0%) | 16 (100.0%) | Ref   | 1 (100.0%) | 2 (100.0%) | Ref   | 32 (100.0%) | 24 (100.0%) | Ref   | 42 (100.0%) | 43 (100.0%) | Ref    |

D- Doctors, N- Nurses and Midwives , MS – Medical Students, NS - Nursing and Midwifery students; Junior- first years of study (1-3 for MS, 1 for NS) / up to 10 years inclusive of work in the profession; Senior- last years of study (4-6 years for MS, 2-3 years for NS) / more than 10 years of work in the profession; \* - low-credibility data due to the low size of the compared groups; - no data in a given group for statistical analysis

**Table S4. Stress, feel of fear or any objections prior to the vaccination against COVID-19 among the vaccinated and not-vaccinated younger and older health care workers.**

|                                           | D<br>N=128 (13.0%) |                | p (for Z<br>test) | N<br>N=101 (10.3%) |                | p (for Z<br>test) | SM<br>N=416 (42.2%) |                 | p (for Z<br>test) | SP<br>N=340 (34.5%) |                 | p (for Z<br>test) | Total<br>N=985 (100%) |                 | p (for Z<br>test) |
|-------------------------------------------|--------------------|----------------|-------------------|--------------------|----------------|-------------------|---------------------|-----------------|-------------------|---------------------|-----------------|-------------------|-----------------------|-----------------|-------------------|
|                                           | Junior             | Senior         |                   | Junior             | Senior         |                   | Junior              | Senior          |                   | Junior              | Senior          |                   | Junior                | Senior          |                   |
| No, not at all                            | 42<br>(63.6%)      | 44<br>(71.0%)  | 0.379             | 12<br>(31.6%)      | 30<br>(47.6%)  | 0.116*            | 31<br>(49.2%)       | 254<br>(72.0%)  | <0.001            | 57<br>(32.8%)       | 67 (40.4%)      | 0.146             | 142<br>(41.6%)        | 395<br>(61.3%)  | <0.001            |
| No, I was a<br>little bit unsure          | 12<br>(18.2%)      | 5 (8.1%)       | 0.094*            | 13<br>(34.2%)      | 7 (11.1%)      | 0.006*            | 17<br>(27.0%)       | 52<br>(14.7%)   | 0.016             | 46<br>(26.4%)       | 50 (30.1%)      | 0.451             | 88 (25.8%)            | 114<br>(17.7%)  | 0.003             |
| I was neutral                             | 6 (9.1%)           | 5 (8.1%)       | 0.836*            | 2 (5.3%)           | 0 (0.0%)       | -                 | 0 (0.0%)            | 3 (0.8%)        | -                 | 4 (2.3%)            | 5 (3.0%)        | 0.682*            | 12 (3.5%)             | 13 (2.0%)       | 0.155             |
| Yes, I felt a<br>little nervous           | 4 (6.1%)           | 5 (8.1%)       | 0.658*            | 9 (23.7%)          | 20<br>(31.7%)  | 0.388*            | 12<br>(19.0%)       | 38<br>(10.8%)   | 0.063*            | 47<br>(27.0%)       | 37 (22.3%)      | 0.314             | 72 (21.1%)            | 100<br>(15.5%)  | 0.028             |
| Yes, I was very<br>nervous and<br>anxious | 2 (3.0%)           | 3 (4.8%)       | 0.599*            | 2 (5.3%)           | 6 (9.5%)       | 0.444*            | 2 (3.2%)            | 5 (1.4%)        | 0.318*            | 20<br>(11.5%)       | 7 (4.2%)        | 0.014*            | 26 (7.6%)             | 21 (3.3%)       | 0.002             |
| No answer                                 | 0 (0.0%)           | 0 (0.0%)       | -                 | 0 (0.0%)           | 0 (0.0%)       | -                 | 1 (1.6%)            | 1 (0.3%)        | 0.169*            | 0 (0.0%)            | 0 (0.0%)        | -                 | 1 (0.3%)              | 1 (0.2%)        | 0.647*            |
| Total                                     | 66<br>(100.0%)     | 62<br>(100.0%) | Ref.              | 38<br>(100.0%)     | 63<br>(100.0%) | Ref.              | 63<br>(100.0%)      | 353<br>(100.0%) | Ref.              | 174<br>(100.0%)     | 166<br>(100.0%) | Ref.              | 341<br>(100.0%)       | 644<br>(100.0%) | Ref.              |

D- Doctors, N- Nurses and Midwives , MS – Medical Students, NS - Nursing and Midwifery students; Junior- first years of study (1-3 for MS, 1 for NS) / up to 10 years inclusive of work in the profession; Senior- last years of study (4-6 years for MS, 2-3 years for NS) / more than 10 years of work in the profession \*- *low*-credibility data due to the low size of the compared groups, - no data in a given group for statistical analysis.

**Table S5. Attitude towards the obligatory annual vaccination against COVID-19 among the vaccinated and not-vaccinated younger and older health care workers.**

|                              | D<br>N=133 (12.7%) |                | p (for Z<br>test) | N<br>N=124 (11.8%) |                | p (for Z<br>test) | SM<br>N=420 (40.0%) |                 | p (for<br>Z test) | SP<br>N=372 (34.5%) |                 | p (for Z<br>test) | Total<br>N=1049 (100%) |                 | p (for Z<br>test) |
|------------------------------|--------------------|----------------|-------------------|--------------------|----------------|-------------------|---------------------|-----------------|-------------------|---------------------|-----------------|-------------------|------------------------|-----------------|-------------------|
|                              | Junior             | Senior         |                   | Junior             | Senior         |                   | Junior              | Senior          |                   | Junior              | Senior          |                   | Junior                 | Senior          |                   |
| Obligatory                   | 36 (52.9%)         | 30 (46.2%)     | 0.435             | 12<br>(25.5%)      | 28<br>(36.4%)  | 0.213*            | 32<br>(50.0%)       | 199<br>(55.9%)  | 0.383             | 54<br>(27.8%)       | 57<br>(32.0%)   | 0.378             | 134<br>(35.9%)         | 314<br>(46.4%)  | 0.001             |
| Obligatory, if<br>it is free | 16 (23.5%)         | 19 (29.2%)     | 0.457             | 15<br>(31.9%)      | 11<br>(14.3%)  | 0.021*            | 17<br>(26.6%)       | 106<br>(29.8%)  | 0.603             | 66<br>(34.0%)       | 61<br>(34.3%)   | 0.960             | 114<br>(30.6%)         | 197<br>(29.1%)  | 0.630             |
| Voluntary                    | 16 (23.5%)         | 16 (24.6%)     | 0.884             | 20<br>(42.6%)      | 38<br>(49.4%)  | 0.463             | 15<br>(23.4%)       | 51<br>(14.3%)   | 0.066             | 74<br>(38.1%)       | 60<br>(33.7%)   | 0.374             | 125<br>(33.5%)         | 165<br>(24.4%)  | 0.002             |
| Total                        | 68<br>(100.0%)     | 65<br>(100.0%) | Ref               | 47<br>(100.0%)     | 77<br>(100.0%) | Ref               | 64<br>(100.0%)      | 356<br>(100.0%) | Ref               | 194<br>(100.0%)     | 178<br>(100.0%) | Ref               | 373<br>(100.0%)        | 676<br>(100.0%) | Ref.              |

D- Doctors, N- Nurses and Midwives , MS – Medical Students, NS - Nursing and Midwifery students; Junior- first years of study (1-3 for MS, 1 for NS) / up to 10 years inclusive of work in the profession; Senior- last years of study (4-6 years for MS, 2-3 years for NS) / more than 10 years of work in the profession; \*- low-credibility data due to the low size of the compared group

**Figure S1.** Flowchart for the study design

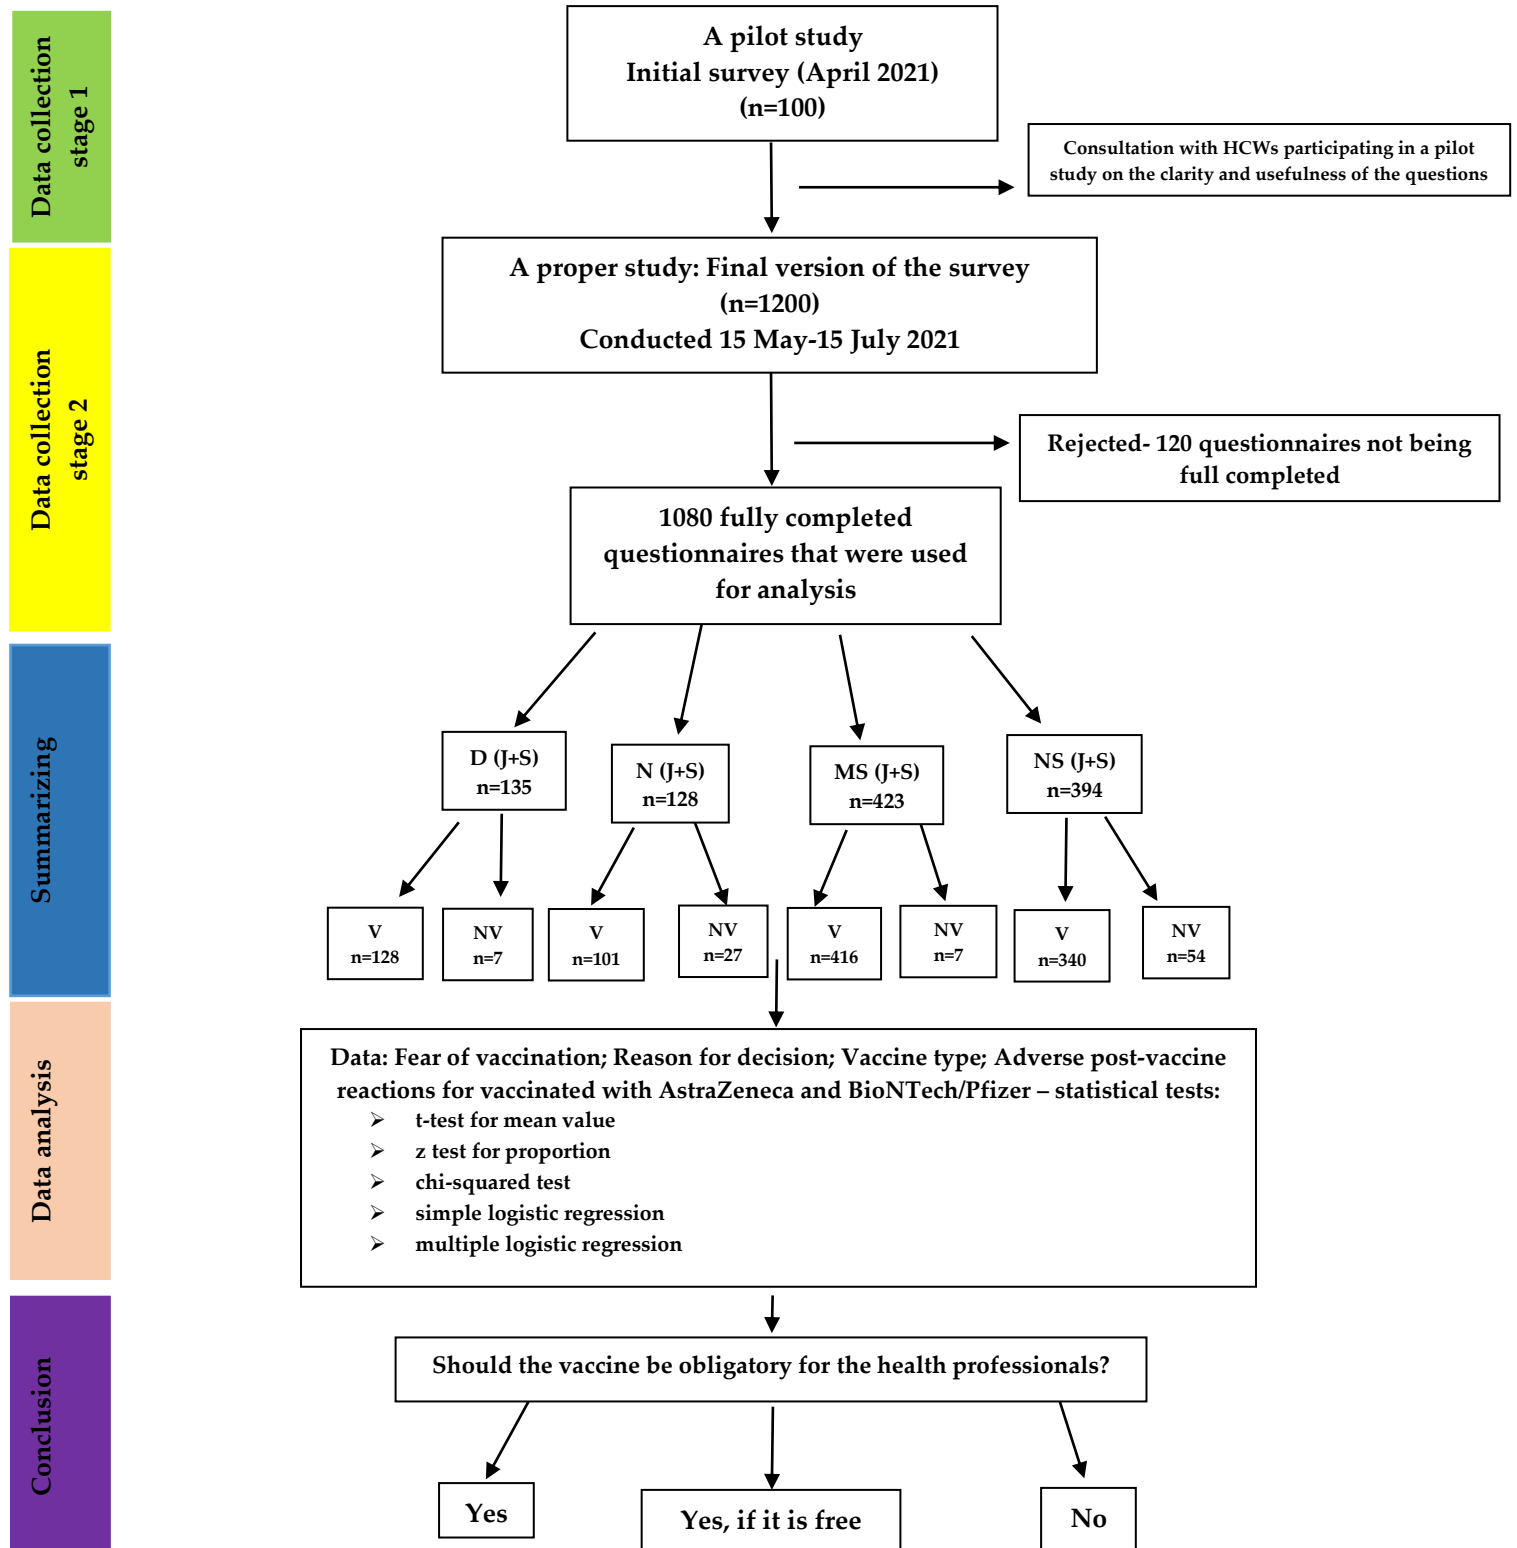

D- Doctors, N- Nurses and Midwives , MS – Medical Students, NS - Nursing and Midwifery students; Junior- first years of study (1-3 for MS, 1 for NS)/up to 10 years inclusive of work in the profession; Senior- last years of study (4-6 years for MS, 2-3 years for NS)/more than 10 years of work in the profession; V- vaccinated, NV- non-vaccinated
